# Supplementary material
Source: publisher figshare collection journal article supplement (https://frontiersin.figshare.com/ndownloader/files/22538375)
Supplement: Supplementary file [file 22538375]

## Supplementary Material

# Molecular Design Based on Donor-Weak Donor Scaffold for Blue Thermally-Activated Delayed Fluorescence Designed by Combinatorial DFT Calculations

**Youichi Tsuchiya<sup>1,2\*</sup>, Keita Tsuji<sup>1,3</sup>, Ko Inada<sup>1,2</sup>, Fatima Bencheikh<sup>1,2</sup>, Yan Geng<sup>1</sup>, Thomas J. L. Mustard<sup>4</sup>, H. Shaun Kwak<sup>4</sup>, Mathew D. Halls<sup>4</sup>, Hajime Nakanotani<sup>1,2,3</sup>, Chihaya Adachi<sup>1,2,3,5\*</sup>**

<sup>1</sup>Center for Organic Photonics and Electronics Research (OPERA), Kyushu University, 744, Motoooka, Nishi-ku, Fukuoka 819-0395, Japan

<sup>2</sup>Japan Science and Technology Agency (JST), ERATO, Adachi Molecular Exciton Engineering Project, Fukuoka 819-0395, Japan

<sup>3</sup>Department of Chemistry and Biochemistry, Kyushu University, 744, Motoooka, Nishi-ku, Fukuoka 819-0395, Japan.

<sup>4</sup>Schrödinger Inc, 10201 Wateridge Circle, Suite 220, San Diego, California, 92121, USA

<sup>5</sup>International Institute for Carbon Neutral Energy Research (WPI-I2CNER), Kyushu University, Fukuoka 819-0395, Japan

### \* Correspondence:

Chihaya Adachi      adachi@cstf.kyushu-u.ac.jp

Youichi Tsuchiya      tsuchiya@opera.kyushu-u.ac.jp

## Contents:

1. Estimation of  $k_r^S$ ,  $f$  and  $Q$  from absorption and emission spectra
2. Detailed derivation of expanded kinetic equations
3. Supplementary Figures and Tables

## References

## 1 Estimation of $k_r^S$ , $f$ and $Q$ from absorption and emission spectra (Hirata et al., 2015)

The relationship between the radiative decay rate ( $k_r^S$ ) and the absorption coefficient ( $\epsilon$ ) in fluorescent molecules can be expressed as

$$k_r^S = 2.88 \times 10^{-9} n^2 \langle \bar{\nu}_f^{-3} \rangle^{-1} \int \epsilon(\nu_a) d \ln \nu_a \quad (S1)$$

$$\langle \bar{\nu}_f^{-3} \rangle^{-1} = \frac{\int f(\nu_f) d\nu_f}{\int f(\nu_f) \nu_f^{-3} d\nu_f} \quad (S2)$$

where  $\nu_f$  is the fluorescence wavenumber,  $f(\nu_f)$  is the fluorescence spectrum at  $\nu_f$ ,  $\nu_a$  is the absorption wavenumber,  $\epsilon(\nu_a)$  is the coefficient at  $\nu_a$ , and  $n$  is the refractive index of the solvent at the average wavenumber of fluorescence  $\langle \nu_f \rangle$  (Strickler and Berg, 1962). To obtain  $\langle \bar{\nu}_f^{-3} \rangle^{-1}$ , two curves were plotted for each spectrum. One curve was the normalized intensities by emission peak maxima at each frequency, and the other curve was  $\bar{\nu}_f^{-3}$  times this value at each frequency. The ratio of the areas under the curves gives  $\langle \bar{\nu}_f^{-3} \rangle^{-1}$ . In an analogous process,  $\langle \nu_f \rangle$  is given by

$$\langle \nu_f \rangle = \frac{\int f(\nu_f) \nu_f d\nu_f}{\int f(\nu_f) d\nu_f} \quad (S3)$$

$\int \epsilon(\nu_a) d \ln \nu_a$  is the area under the curve of  $\epsilon(\nu_a)$  for the charge transfer (CT) absorption band (red solid curves in Figure S2) at  $\ln \nu_a$ . The relationship between the oscillator strength for absorption ( $f$ ), transition dipole moment for absorption ( $Q$ ), and  $\epsilon(\nu_a)$  can be experimentally determined as

$$f = 4.32 \times 10^{-9} n^{-1} \int \epsilon(\nu_a) d\nu_a = \left( \frac{8\pi^2 m_e c \langle \nu_f \rangle}{3h e^2} \right) |Q|^2 \quad (S4)$$

where  $m_e$  is the electron mass,  $c$  is the speed of light,  $h$  is Planck's constant, and  $e$  is the elementary charge (Mulliken, 1939). Here,  $n$  is the refractive index of the solvent at the peak maximum of the gauss curve of CT absorption.

## 2 Detailed derivation of expanded kinetic equations

When the direct non-radiative decay processes from the singlet ( $S_1$ ) and higher triplet ( $T_n$ ) state to ground state ( $S_0$ ) are scarcely occur and all intersystem crossing passes through the  $T_n$  state, the efficiency of each process ( $\Phi$ ) can written by

$$\begin{aligned} \Phi_{FL} + \Phi_{ISC} &= \Phi_{FL} + \Phi_{ISC} (\Phi_{RISC} + \Phi_{IC}^T) = \Phi_{FL} + \Phi_{DE1} + \Phi_{ISC} \Phi_{IC}^T (\Phi_{RIC}^T + \Phi_r^T + \Phi_{nr}^T) \\ &= \Phi_{FL} + \Phi_{DE1} + \Phi_{ISC} \Phi_{IC}^T \Phi_{RIC}^T + \Phi_{ISC} \Phi_{IC}^T \Phi_r^T + \Phi_{ISC} \Phi_{IC}^T \Phi_{nr}^T \\ &= \Phi_{FL} + \Phi_{DE1} + \Phi_{DF2} + \Phi_{Phos} + \Phi_{ISC} \Phi_{IC}^T \Phi_{nr}^T = \Phi_{FL} + \Phi_{DE1} + \Phi_{DE2} + \Phi_{ISC} \Phi_{IC}^T \Phi_{nr}^T \\ &= \Phi_{PLQY} + \Phi_{ISC} \Phi_{IC}^T \Phi_{nr}^T = 1 \end{aligned} \quad (S5)$$

where  $\Phi_{FL}$  is the fraction of radiative decay from the excited lowest energy singlet ( $S_1$ ) state (fluorescence),  $\Phi_{ISC}$  is the fraction of intersystem crossing (ISC),  $\Phi_{RISC}$  is the fraction of reverse intersystem crossing (RISC) of triplet excitons,  $\Phi_{IC}^T$  is the fraction of exothermic internal conversion (IC) from the  $T_n$  state to the lowest triplet ( $T_1$ ) state,  $\Phi_{RIC}^T$  is the fraction of endothermic reverse IC from the  $T_1$  to  $T_n$  state,  $\Phi_r^T$  is the fraction of radiative decay of triplet excitons from the  $T_1$  state,  $\Phi_{nr}^T$  is the fraction of non-radiative decay of triplet excitons from the  $T_1$  state,  $\Phi_{DE1}$  is the fraction of delayed emission provided by  $\Phi_{ISC}\Phi_{RISC}$  (i.e. faster delayed fluorescence,  $\Phi_{DF1}$ ),  $\Phi_{DF2}$  is the fraction of latter delayed fluorescence provided by  $\Phi_{ISC}\Phi_{IC}^T\Phi_{RIC}^T$ ,  $\Phi_{Phos}$  is the fraction of phosphorescence provided by  $\Phi_{ISC}\Phi_{IC}^T\Phi_r^T$ ,  $\Phi_{DE2}$  is the total fraction of delayed emission *via* the  $T_1$  state ( $\Phi_{DF2} + \Phi_{Phos}$ ), and  $\Phi_{PLQY}$  is the fraction of total emission efficiency provided by  $\Phi_{FL} + \Phi_{DE1} + \Phi_{DE2}$ .

The singlet exciton lifetime ( $\tau_S$ ) and each triplet exciton lifetime ( $\tau_{Tn}$  and  $\tau_{T1}$ ) are written by

$$\tau_S = \tau_{FL} = \frac{1}{k_r^S + k_{ISC}} \quad (S6)$$

$$\tau_{Tn} = \tau_{DE1} = \frac{1}{\Phi_{FL}k_{RISC} + k_{IC}^T} \quad (S7)$$

$$\tau_{T1} = \tau_{DE2} = \tau_{DF2} = \tau_{Phos} = \frac{1}{\Phi_{RISC}k_{RIC}^T + k_r^T + k_{nr}^T} \quad (S8)$$

where  $k_r^S$  is the radiative decay rate from the  $S_1$  state,  $k_{ISC}$  is the ISC rate,  $k_{nr}^S$  is the non-radiative decay rate from the  $S_1$  state,  $k_{RISC}$  is the RISC rate,  $k_{IC}^T$  is the exothermic IC rate to the  $T_1$  state,  $k_{RIC}^T$  is the endothermic reverse IC rate from the  $T_1$  state,  $k_r^T$  is the radiative decay rate from the  $T_1$  state and  $k_{nr}^T$  is the non-radiative decay rate from the  $T_1$  state. Considering the ISC/RISC cycle (limited by  $k_{RISC}$ ) and the IC/RIC cycle (limited by  $k_{RIC}$ ), the actual decay speed through the RISC and IC processes should depend on  $\Phi_{FL} + \Phi_{nr}^S = 1 - \Phi_{ISC}$  and  $\Phi_{RISC}$ , respectively.  $\tau_S$ ,  $\tau_{Tn}$  and  $\tau_{T1}$  are the lifetimes of the observed fluorescence ( $\tau_{FL}$ ), first component of delayed emission ( $\tau_{DE1}$ ) and second component of delayed emission ( $\tau_{DE2}$ ), respectively.

The singlet and each triplet decay rate ( $k^S$ ,  $k_1^T$  and  $k_2^T$ ) are written by

$$k^S = k_r^S + k_{ISC} = 1/\tau_{FL} \quad (S9)$$

$$k_1^T = \Phi_{FL}k_{RISC} + k_{IC}^T = 1/\tau_{DE1} \quad (S10)$$

$$k_2^T = \Phi_{RISC}k_{RIC}^T + k_r^T + k_{nr}^T = 1/\tau_{DE2} \quad (S11)$$

Summarizing the above discussion, each efficiency is written by

$$\Phi_{FL} = \frac{k_r^S}{k_r^S + k_{ISC}} = k_r^S \tau_{FL} \quad (S12)$$

$$\Phi_{ISC} = \frac{k_{ISC}}{k_r^S + k_{ISC}} = k_{ISC} \tau_{FL} \quad (S13)$$

$$\Phi_{RISC} = \frac{\Phi_{FL} k_{RISC}}{\Phi_{FL} k_{RISC} + k_{IC}^T} = (1 - \Phi_{ISC}) k_{RISC} \tau_{DE1} \quad (S14)$$

$$\Phi_{IC}^T = \frac{k_{IC}^T}{\Phi_{FL} k_{RISC} + k_{IC}^T} = k_{IC}^T \tau_{DE1} = 1 - \Phi_{RISC} \quad (S15)$$

$$\Phi_{RIC}^T = \frac{\Phi_{RISC} k_{RIC}^T}{\Phi_{RISC} k_{RIC}^T + k_r^T + k_{nr}^T} = \Phi_{RISC} k_{RIC}^T \tau_{DE2} \quad (S16)$$

$$\Phi_r^T = \frac{k_r^T}{\Phi_{RISC} k_{RIC}^T + k_r^T + k_{nr}^T} = k_r^T \tau_{DE2} \quad (S17)$$

$$\Phi_{nr}^T = \frac{k_{nr}^T}{\Phi_{RISC} k_{RIC}^T + k_r^T + k_{nr}^T} = k_{nr}^T \tau_{DE2} = \frac{1 - \Phi_{PLQY}}{\Phi_{ISC} \Phi_{IC}^T} \quad (S18)$$

Summarizing the above equations, each rate constant is written by

$$k_r^S = \frac{\Phi_{FL}}{\tau_{FL}} = k^S \Phi_{FL} \quad (S19)$$

$$k_{ISC} = \frac{\Phi_{ISC}}{\tau_{FL}} = k^S \Phi_{ISC} = k^S (1 - \Phi_{FL}) \quad (S20)$$

$$k_{RISC} = \frac{\Phi_{RISC}}{\Phi_{FL} \tau_{DE1}} = \frac{\Phi_{DE1}}{\Phi_{FL} k_{ISC} \tau_{FL} \tau_{DE1}} = \frac{\Phi_{DE1}}{\Phi_{FL}} \cdot \frac{k^S k_1^T}{k_{ISC}} \quad (S21)$$

$$k_{IC}^T = \frac{1}{\tau_{DE1}} - \Phi_{FL} k_{RISC} = k_1^T - \Phi_{FL} k_{RISC} \quad (S22)$$

$$k_{RIC}^T = \frac{\Phi_{RIC}^T}{\tau_{DE2} \Phi_{RISC}} = k_2^T \cdot \frac{\Phi_{RIC}^T}{\Phi_{RISC}} \approx k_2^T \cdot \frac{\Phi_{DE2}}{\Phi_{ISC} \Phi_{RISC} \Phi_{IC}^T} \quad (\because \Phi_r^T \approx 0) \quad (S23)$$

$$k_r^T = \frac{\Phi_r^T}{\tau_{DE2}} = k_2^T \Phi_r^T \quad (S24)$$

$$k_{nr}^T = \frac{\Phi_{nr}^T}{\tau_{DE2}} = k_2^T \Phi_{nr}^T = k_2^T \cdot \frac{1 - \Phi_{PLQY}}{(1 - \Phi_{FL}) \Phi_{IC}^T} \quad (S25)$$

When we use the assumption of  $\Phi_r^T$  as 0, the  $k_{RIC}^T$  is overestimated. From Eq. S5, the relationship of  $\Phi_{RIC}^T$  and  $\Phi_r^T$  is written by

$$\Phi_{RIC}^T + \Phi_r^T = \frac{\Phi_{DE2}}{\Phi_{ISC} \Phi_{IC}^T} \quad (S28)$$

When the phosphorescence ratio in the second delayed emission ( $\Phi_{DE2}$ ) can be estimated, both  $\Phi_{RIC}^T$  and  $\Phi_r^T$  can be determined by Eq. S28. It would be reasonable to assume  $\Phi_r^T$  as 0 at 300 K, while the phosphorescence ratio can be obtained by fitting of the prompt fluorescence emission and cryogenic phosphorescence emission.

### 3 Supplementary Figures and Tables

**Table S1.** Calculated and estimated energy levels of pre-synthesized homo-junction materials.

| Structure | HOMO distribution <sup>[a]</sup>                                                  | LUMO Distribution <sup>[a]</sup>                                                  | Functional1//Functional2        | Vertical <sup>[b]</sup> |                     |                       | Adiabatic <sup>[c]</sup> |                     |                       | PLQY (%) <sup>[f]</sup> | Lifetime (ns) <sup>[f]</sup> |
|-----------|-----------------------------------------------------------------------------------|-----------------------------------------------------------------------------------|---------------------------------|-------------------------|---------------------|-----------------------|--------------------------|---------------------|-----------------------|-------------------------|------------------------------|
|           |                                                                                   |                                                                                   |                                 | S <sub>1</sub> (eV)     | T <sub>1</sub> (eV) | ΔE <sub>ST</sub> (eV) | S <sub>1</sub> (eV)      | T <sub>1</sub> (eV) | ΔE <sub>ST</sub> (eV) |                         |                              |
| <b>S1</b> | 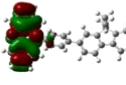 |  | B3LYP//B3LYP                    | 2.87                    | 2.86                | 0.01                  | -                        | -                   | -                     |                         |                              |
|           |                                                                                   |                                                                                   | M06-2X//M06-2X                  | 3.80                    | 3.31                | 0.49                  | 3.42                     | 2.33                | 0.73                  | 16                      | 72                           |
|           |                                                                                   |                                                                                   | LC-ωPBE* <sup>[d]</sup> //B3LYP | 3.51                    | 2.94                | 0.57                  | 3.14                     | 2.15                | 0.67                  | (22)                    | (129)                        |
|           |                                                                                   |                                                                                   | Experimental <sup>[e]</sup>     | -                       | -                   | -                     | 3.02                     | 2.64                | 0.38                  |                         |                              |
| <b>S2</b> |  |  | B3LYP//B3LYP                    | 2.75                    | 2.74                | 0.01                  | -                        | -                   | -                     |                         |                              |
|           |                                                                                   |                                                                                   | M06-2X//M06-2X                  | 3.90                    | 3.33                | 0.57                  | 3.11                     | 2.28                | 0.55                  | 19                      | 120                          |
|           |                                                                                   |                                                                                   | LC-ωPBE* <sup>[d]</sup> //B3LYP | 3.37                    | 2.92                | 0.45                  | 2.88                     | 2.10                | 0.55                  | (25)                    | (120)                        |
|           |                                                                                   |                                                                                   | Experimental <sup>[e]</sup>     | -                       | -                   | -                     | 2.95                     | 2.48                | 0.47                  |                         |                              |
| <b>S3</b> |  |  | B3LYP//B3LYP                    | 2.75                    | 2.73                | 0.03                  | -                        | -                   | -                     |                         |                              |
|           |                                                                                   |                                                                                   | M06-2X//M06-2X                  | 3.66                    | 3.18                | 0.48                  | -                        | -                   | -                     | 0.9                     | 3.0/ 7.9                     |
|           |                                                                                   |                                                                                   | LC-ωPBE* <sup>[d]</sup> //B3LYP | 3.68                    | 3.21                | 0.47                  | 2.88                     | 1.91                | 0.56                  | (1.9)                   | (3.6/ 13.1)                  |
|           |                                                                                   |                                                                                   | Experimental <sup>[e]</sup>     | -                       | -                   | -                     | 3.08                     | 2.65                | 0.43                  |                         |                              |
| <b>S4</b> |  |  | B3LYP//B3LYP                    | 3.05                    | 3.04                | 0.01                  | -                        | -                   | -                     |                         |                              |
|           |                                                                                   |                                                                                   | M06-2X//M06-2X                  | 3.99                    | 3.52                | 0.47                  | -                        | -                   | -                     | 1.4                     | 2.7                          |
|           |                                                                                   |                                                                                   | LC-ωPBE* <sup>[d]</sup> //B3LYP | 3.62                    | 3.16                | 0.46                  | 2.89                     | 1.89                | 0.56                  | (1.9)                   | (3.0/ 10.3)                  |
|           |                                                                                   |                                                                                   | Experimental <sup>[e]</sup>     | -                       | -                   | -                     | 3.07                     | 2.67                | 0.40                  |                         |                              |

[a] Calculated using the B3LYP/6-31G(d) level of theory. [b] Vertical values were estimated using the PCM(toluene)-TDA-Functional1/6-31+g(d)//Functional2/6-31g(d) level of theory. [c] Adiabatic values were estimated using the PCM(toluene)-TDA-Functional1/6-31+g(d)//PCM(toluene)-TD(singlet)/DFT(triplet)-CAM-B3LYP/6-31g(d) level of theory. [d]  $\omega$  values were tuned for **S1**, **S2**, **S3** and **S4** as 0.1831, 0.1713, 0.1868 and 0.1908, respectively. [e] Experimental values were measured in toluene ( $1.0 \times 10^{-5}$  mol L<sup>-1</sup>). [f] PLQY and lifetime values were measured in toluene ( $1.0 \times 10^{-5}$  mol L<sup>-1</sup>) under air saturated or N<sub>2</sub> saturated (bracketed) conditions.

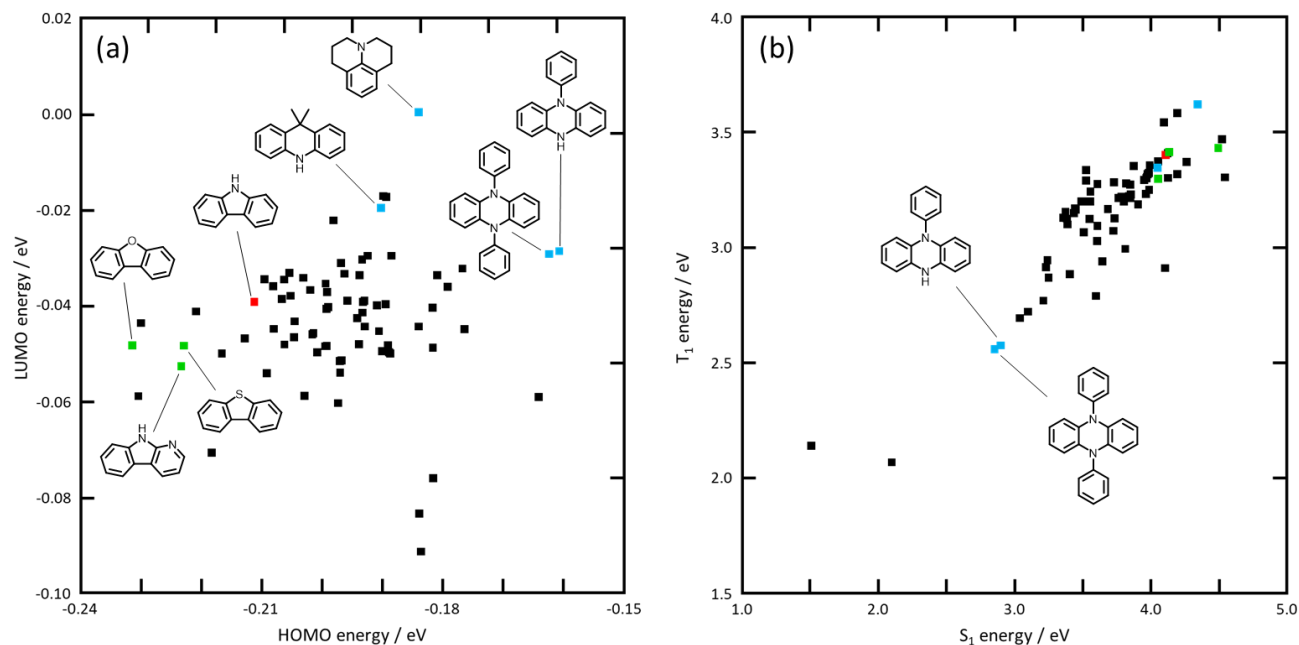

**Figure S1.** (a) HOMO/LUMO level and (b) S<sub>1</sub>/T<sub>1</sub> level plots of donor units using combinatorial B3LYP DFT calculations.

**Table S2.** DFT calculation results for final TADF candidates of **1–7**.

| TADF candidates | Functional1//Functional2                 | Vertical <sup>[a]</sup> |                     |                      | Adiabatic <sup>[b]</sup> |                     |                      |
|-----------------|------------------------------------------|-------------------------|---------------------|----------------------|--------------------------|---------------------|----------------------|
|                 |                                          | S <sub>1</sub> (eV)     | T <sub>1</sub> (eV) | $\Delta E_{ST}$ (eV) | S <sub>1</sub> (eV)      | T <sub>1</sub> (eV) | $\Delta E_{ST}$ (eV) |
| <b>1</b>        | B3LYP//B3LYP                             | 3.07                    | 3.05                | 0.02                 | 3.64                     | 2.63                | 0.02                 |
|                 | M06-2X//M06-2X                           | 3.88                    | 3.78                | 0.10                 | 3.45                     | 3.29                | 0.12                 |
|                 | LC- $\omega$ PBE* <sup>[c]</sup> //B3LYP | 3.64                    | 3.42                | 0.22                 | 3.30                     | 2.76                | 0.32                 |
| <b>2</b>        | B3LYP//B3LYP                             | 3.13                    | 3.08                | 0.05                 | N/A <sup>[d]</sup>       | N/A <sup>[d]</sup>  | N/A <sup>[d]</sup>   |
|                 | M06-2X//M06-2X                           | 4.04                    | 3.73                | 0.31                 | 3.86                     | 3.54                | 0.33                 |
|                 | LC- $\omega$ PBE* <sup>[c]</sup> //B3LYP | 3.70                    | 3.39                | 0.31                 | 3.54                     | 3.21                | 0.33                 |
| <b>3</b>        | B3LYP//B3LYP                             | 3.04                    | 3.02                | 0.02                 | 2.67                     | 2.65                | 0.01                 |
|                 | M06-2X//M06-2X                           | 3.84                    | 3.74                | 0.11                 | 3.47                     | 3.26                | 0.13                 |
|                 | LC- $\omega$ PBE* <sup>[c]</sup> //B3LYP | 3.39                    | 3.61                | 0.22                 | 3.31                     | 2.74                | 0.33                 |
| <b>4</b>        | B3LYP//B3LYP                             | 3.08                    | 3.07                | 0.01                 | 2.68                     | 2.66                | 0.01                 |
|                 | M06-2X//M06-2X                           | 3.85                    | 3.78                | 0.07                 | 3.44                     | 3.27                | 0.08                 |
|                 | LC- $\omega$ PBE* <sup>[c]</sup> //B3LYP | 3.50                    | 3.41                | 0.09                 | 3.19                     | 2.78                | 0.19                 |
| <b>5</b>        | B3LYP//B3LYP                             | 3.03                    | 2.98                | 0.05                 | N/A <sup>[d]</sup>       | N/A <sup>[d]</sup>  | N/A <sup>[d]</sup>   |
|                 | M06-2X//M06-2X                           | 3.95                    | 3.73                | 0.22                 | 3.79                     | 3.50                | 0.29                 |
|                 | LC- $\omega$ PBE* <sup>[c]</sup> //B3LYP | 3.62                    | 3.38                | 0.24                 | 3.43                     | 3.17                | 0.26                 |
| <b>6</b>        | B3LYP//B3LYP                             | 3.00                    | 2.97                | 0.03                 | N/A <sup>[d]</sup>       | N/A <sup>[d]</sup>  | N/A <sup>[d]</sup>   |
|                 | M06-2X//M06-2X                           | 3.94                    | 3.75                | 0.19                 | 3.71                     | 3.56                | 0.15                 |
|                 | LC- $\omega$ PBE* <sup>[c]</sup> //B3LYP | 3.57                    | 3.39                | 0.18                 | 3.43                     | 3.26                | 0.17                 |
| <b>7</b>        | B3LYP//B3LYP                             | 2.99                    | 2.97                | 0.02                 | N/A <sup>[d]</sup>       | N/A <sup>[d]</sup>  | N/A <sup>[d]</sup>   |
|                 | M06-2X//M06-2X                           | 3.87                    | 3.61                | 0.26                 | 3.68                     | 3.42                | 0.26                 |
|                 | LC- $\omega$ PBE* <sup>[c]</sup> //B3LYP | 3.55                    | 3.44                | 0.11                 | 3.37                     | 3.13                | 0.24                 |

[a] Vertical values were estimated using the PCM(toluene)-TDA-Functional1/6-31+g(d)//Functional2/6-31g(d) level of theory. [b] Adiabatic values were estimated using the PCM(toluene)-TDA-Functional1/6-31+g(d)//PCM(toluene)-TD(singlet)/DFT(triplet)-CAM-B3LYP/6-31+g(d) level of theory. [c]  $\omega$  values were tuned for **1**, **2**, **3**, **4**, **5**, **6** as 0.1850, 0.1843, 0.1839, 0.1841, 0.1843, 0.1843 and 0.1843, respectively. [d] Adiabatic T<sub>1</sub> energies from B3LYP single-point calculations were not available since TDA calculations at B3LYP failed to converge at a triplet state that is lower in energy than S<sub>1</sub> state at the geometry optimized with CAM-B3LYP.

**Table S3.** HOMO-LUMO distributions and natural transition orbitals (NTO) for the lowest singlet excitation of **1–7** calculated by DFT with the B3LYP/6-31+g(d) level of theory (Martin, 2003).

|   | Structure | HOMO distribution | LUMO distribution | NTO ( $S_1$ ) hole | NTO ( $S_1$ ) particle |
|---|-----------|-------------------|-------------------|--------------------|------------------------|
| 1 |           |                   |                   |                    |                        |
| 2 |           |                   |                   |                    |                        |
| 3 |           |                   |                   |                    |                        |
| 4 |           |                   |                   |                    |                        |
| 5 |           |                   |                   |                    |                        |
| 6 |           |                   |                   |                    |                        |
| 7 |           |                   |                   |                    |                        |

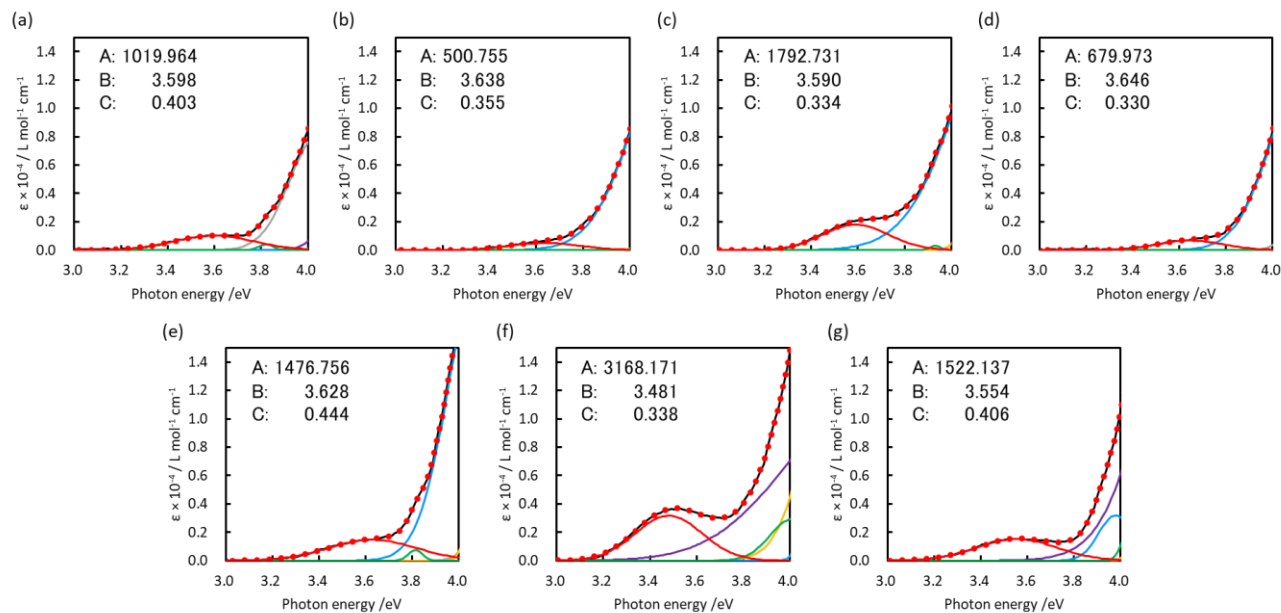

**Figure S2.** Absorption characteristics of guests in toluene solution; (a) **1**, (b) **2**, (c) **3**, (d) **4**, (e) **5**, (f) **6**, (g) **7**. In general, the lines represent the molar absorption coefficient ( $\epsilon$ ) vs. absorption photon energy characteristics. Colored lines represent fitting curves when the fine spectra (dotted red line) are expressed by a summation of each curve based on the Gaussian model:  $\epsilon_n(\nu) = A_n \exp(-(\nu - B_n)^2 / 2C_n^2)$  (n = 1, 2, 3...), where  $A_n$  is the amplitude,  $B_n$  is the average wavenumber and  $C_n$  is the distribution parameter. Solid black lines are experimental spectra. The absorption with the lowest absorption wavenumber (red solid lines) corresponds to CT absorption in each of **1-7**.

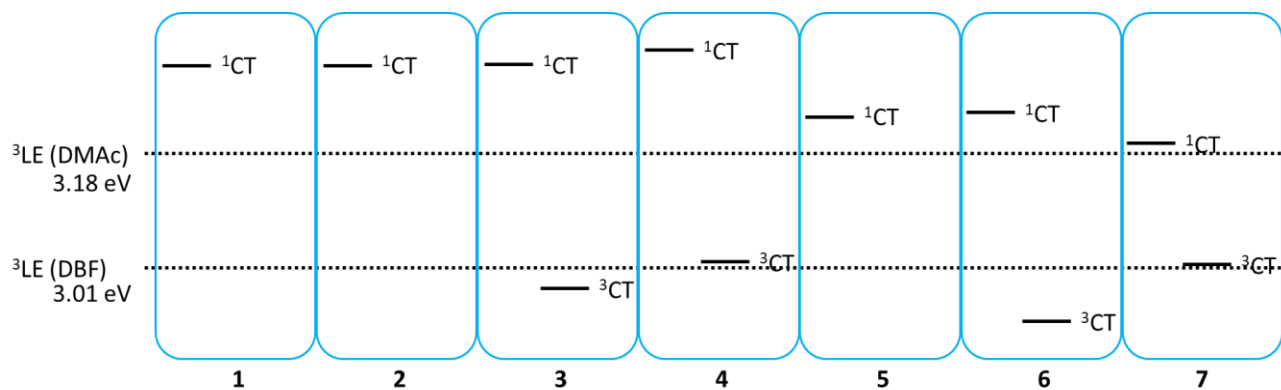

**Figure S3.** Summary of observed exciton energy levels of charge transfer singlet state ( $^1\text{CT}$ ), charge transfer triplet state ( $^3\text{CT}$ ) and local excited triplet state ( $^3\text{LE}$ ) of **1-7**.  $^3\text{CT}$  for **1**, **2**, and **5** could not be observed by spectroscopy,  $^3\text{CT}$  for **4** and **7** were observed in phosphorescence as a mixing to  $^3\text{LE}$ .



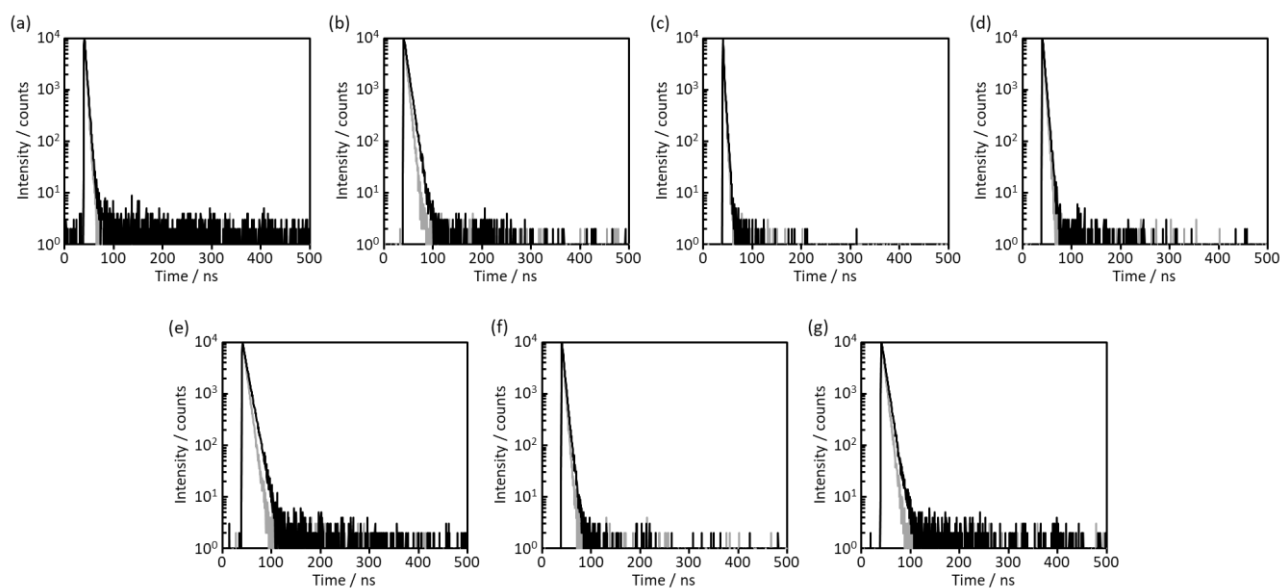

**Figure S4.** Transient emission decay curves in toluene solution ( $1.0 \times 10^{-5}$  mol L<sup>-1</sup>); (a) **1**, (b) **2**, (c) **3**, (d) **4**, (e) **5**, (f) **6**, (g) **7**; black lines, N<sub>2</sub> saturated conditions; gray lines, air saturated conditions.

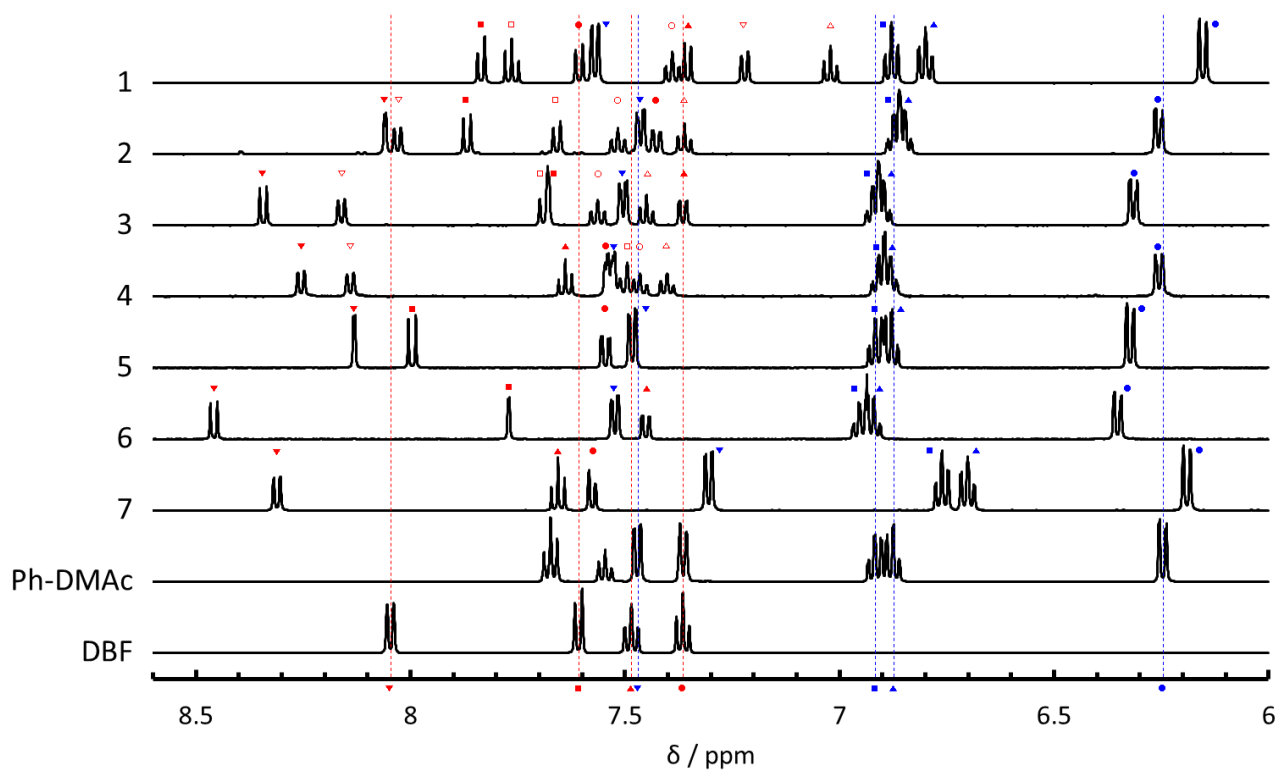

**Figure S5.** <sup>1</sup>H NMR spectra of **1–7**, **Ph-DMAc** and **DBF** in THF-*d*<sub>8</sub> solution. Broken red and blue lines indicate proton peaks based on **DBF** and **DMAc** units of **Ph-DMAc**, respectively.

**Table S4.**  $^1\text{H}$  NMR chemical shifts (ppm) of DMAc units for **1–7** and **Ph-DMAc** in  $\text{THF-}d_8$ 

|                | <b>H<sup>1</sup></b> | <b>H<sup>2</sup></b> | <b>H<sup>3</sup></b> | <b>H<sup>4</sup></b> | <b>Me</b>  |
|----------------|----------------------|----------------------|----------------------|----------------------|------------|
| <b>1</b>       | 7.58                 | 6.80                 | 6.88                 | 6.15                 | 1.97/ 1.68 |
| <b>2</b>       | 7.46                 | 6.85                 | 6.87                 | 6.26                 | 1.69       |
| <b>3</b>       | 7.50                 | 6.90                 | 6.92                 | 6.31                 | 1.72       |
| <b>4</b>       | 7.53                 | 6.88                 | 6.91                 | 6.26                 | 1.72       |
| <b>5</b>       | 7.48                 | 6.88                 | 6.92                 | 6.32                 | 1.70       |
| <b>6</b>       | 7.52                 | 6.92                 | 6.95                 | 6.35                 | 1.74       |
| <b>7</b>       | 7.31                 | 6.70                 | 6.76                 | 6.19                 | 1.42       |
| <b>Ph-DMAc</b> | 7.47                 | 6.88                 | 6.92                 | 6.25                 | 1.68       |

**Table S5.**  $^1\text{H}$  NMR chemical shifts (ppm) of DBF units for **1–7** and DBF in  $\text{THF-}d_8$ .

|            | <b>H<sup>1</sup> (H<sup>9</sup>)</b> | <b>H<sup>2</sup> (H<sup>8</sup>)</b> | <b>H<sup>3</sup> (H<sup>7</sup>)</b> | <b>H<sup>4</sup> (H<sup>6</sup>)</b> |
|------------|--------------------------------------|--------------------------------------|--------------------------------------|--------------------------------------|
| <b>1</b>   | -<br>(7.22)                          | 7.35<br>(7.02)                       | 7.76<br>(7.39)                       | 7.84<br>(7.61)                       |
| <b>2</b>   | 8.06<br>(8.03)                       | -<br>(7.36)                          | 7.43<br>(7.52)                       | 7.87<br>(7.66)                       |
| <b>3</b>   | 8.34<br>(8.16)                       | 7.36<br>(7.45)                       | -<br>(7.56)                          | 7.68<br>(7.69)                       |
| <b>4</b>   | 8.25<br>(8.14)                       | 7.64<br>(7.40)                       | 7.54<br>(7.47)                       | -<br>(7.50)                          |
| <b>5</b>   | 8.13                                 | -                                    | 7.55                                 | 8.00                                 |
| <b>6</b>   | 8.46                                 | 7.45                                 | -                                    | 7.77                                 |
| <b>7</b>   | 8.31                                 | 7.66                                 | 7.58                                 | -                                    |
| <b>DBF</b> | 8.05                                 | 7.37                                 | 7.48                                 | 7.61                                 |

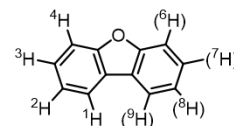

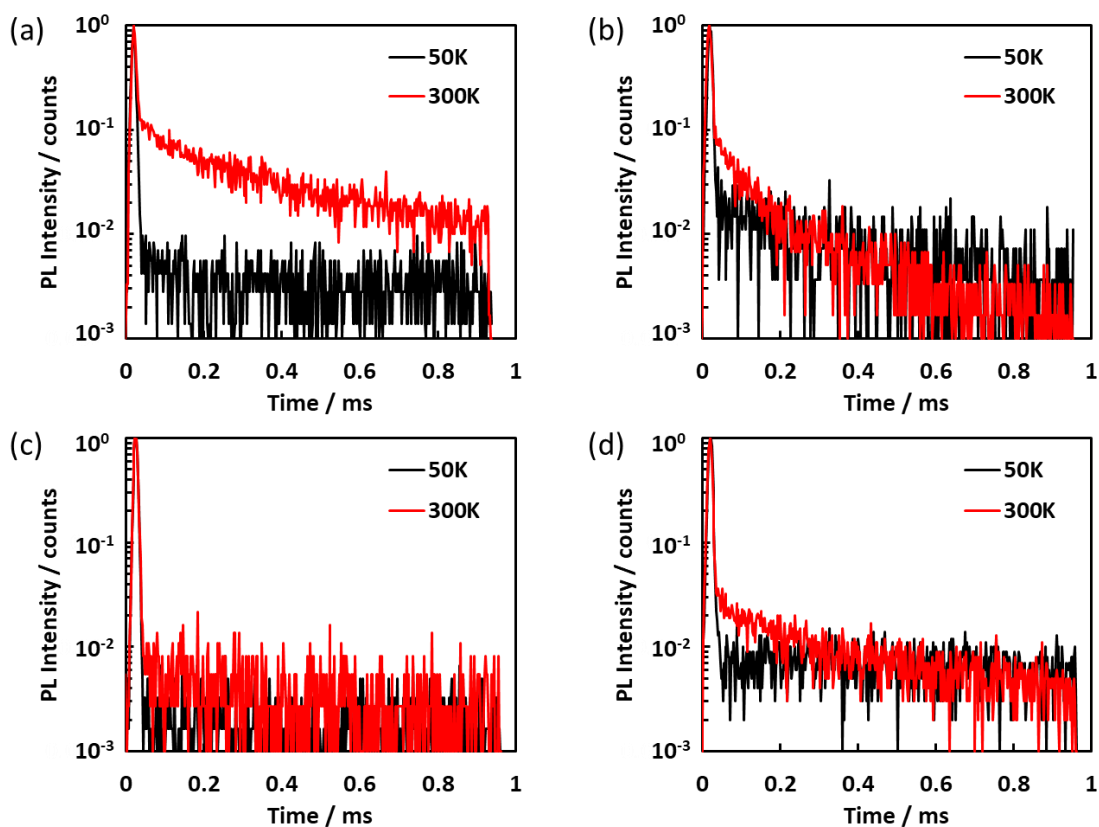

**Figure S6.** Temperature dependency of transient emission decay of **DPEPO** films doped with (a) **5** and (b) **6** (6 wt%).

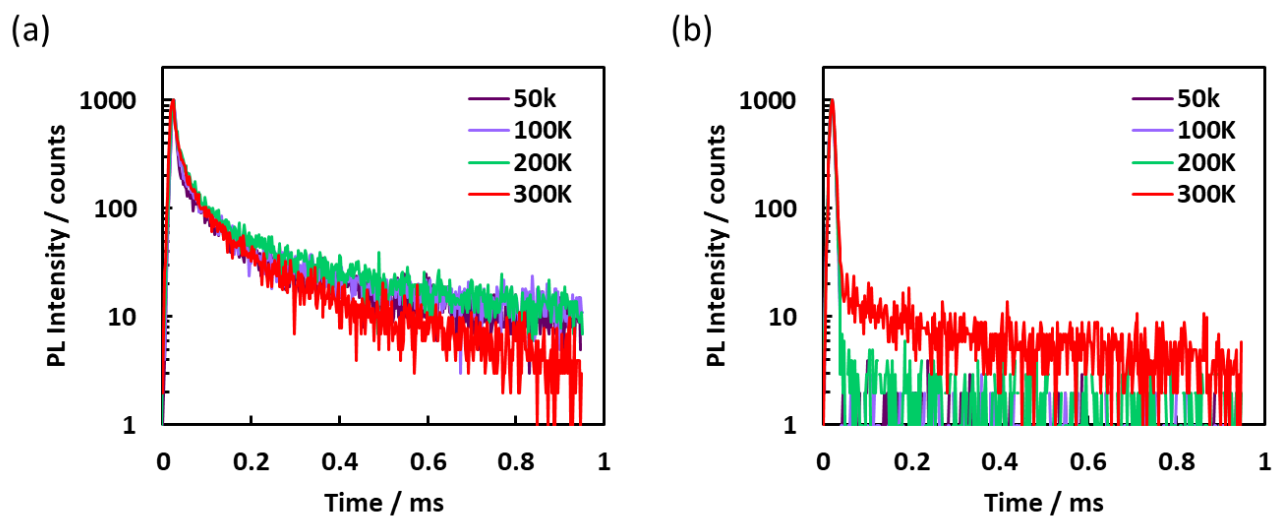

**Figure S7.** Temperature dependency of transient emission decay of **DPEPO** films doped with (a) **1**, (b) **2**, (c) **3** and (d) **6** (6 wt%).

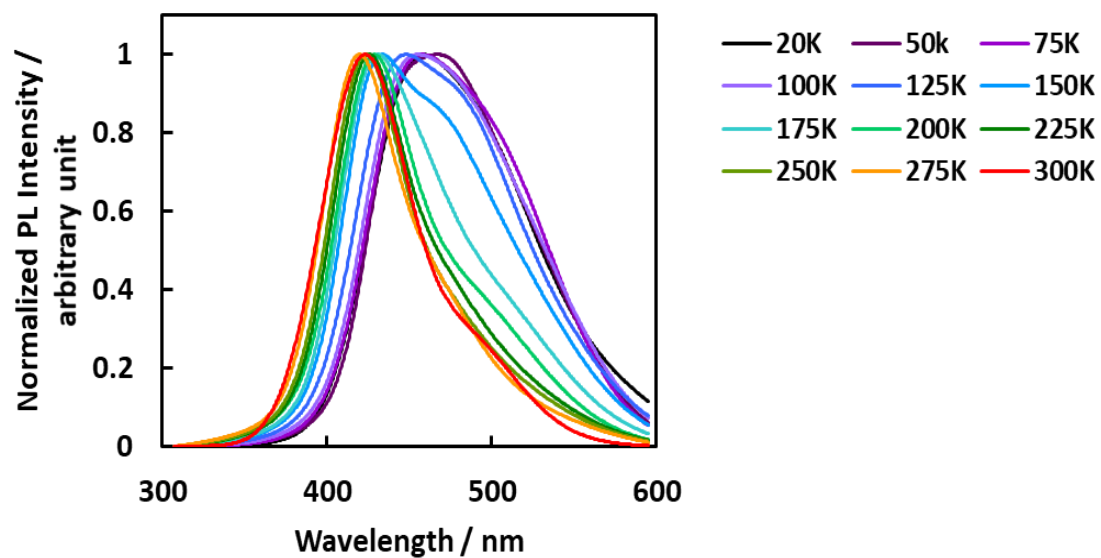

**Figure S8.** Temperature dependency of delayed emission spectra of **DPEPO** films doped with **7** (6 wt%).

**Table S6.** Photophysical properties using the four-state analysis for **1–7**;  $\Phi_r^T$  were assumed as 0 for simplicity.

|                                              | <b>1</b> | <b>2</b> | <b>3</b> | <b>4</b> | <b>5</b> | <b>6</b> | <b>7</b> |
|----------------------------------------------|----------|----------|----------|----------|----------|----------|----------|
| $\Phi_{\text{PLQY}}$                         | 0.15     | 0.14     | 0.14     | 0.11     | 0.27     | 0.39     | 0.15     |
| $S_1$ (eV)                                   | 3.38     | 3.43     | 3.42     | 3.41     | 3.18     | 3.25     | 3.37     |
| $T_1$ (eV)                                   | 3.08     | 3.07     | 3.00     | 3.18     | 3.10     | 2.90     | 3.08     |
| $\Delta E_{\text{ST}}$ (eV)                  | 0.30     | 0.36     | 0.42     | 0.23     | 0.08     | 0.35     | 0.29     |
| $\tau_{\text{prompt}}$ (ns)                  | 4.1      | 6.8      | 3.6      | 3.6      | 3.0      | 3.5      | 3.4      |
| $\tau_{\text{delay1}}$ ( $\mu\text{s}$ )     | 231      | 78       | 8.13     | 237      | 63       | 212      | 172      |
| $\tau_{\text{delay2}}$ (ms)                  | 3.7      | 0.53     | -        | 15.6     | 0.43     | 7.3      | 2.2      |
| $\Phi_{\text{prompt}}$                       | 0.012    | 0.044    | 0.020    | 0.007    | 0.051    | 0.051    | 0.036    |
| $\Phi_{\text{delay1}}$                       | 0.035    | 0.043    | 0.120    | 0.006    | 0.107    | 0.019    | 0.043    |
| $\Phi_{\text{delay2}}$                       | 0.103    | 0.053    | -        | 0.097    | 0.112    | 0.319    | 0.072    |
| $k_r^S$ ( $10^7 \text{ s}^{-1}$ )            | 0.30     | 0.64     | 0.55     | 0.20     | 1.69     | 1.46     | 1.05     |
| $k_{\text{ISC}}$ ( $10^8 \text{ s}^{-1}$ )   | 2.41     | 1.41     | 2.72     | 2.76     | 3.16     | 2.71     | 2.84     |
| $k_{\text{RISC}}$ ( $10^4 \text{ s}^{-1}$ )  | 1.25     | 1.33     | 0.08     | 0.38     | 3.51     | 0.19     | 0.72     |
| $k_{\text{IC}}^T$ ( $10^3 \text{ s}^{-1}$ )  | 4.18     | 12.2     | -        | 4.20     | 14.0     | 4.62     | 5.56     |
| $k_{\text{RIC}}^T$ ( $10^2 \text{ s}^{-1}$ ) | 8.25     | 24.2     | -        | 9.86     | 27.8     | 22.8     | 8.00     |
| $k_{\text{nr}}^T$ ( $10^2 \text{ s}^{-1}$ )  | 2.43     | 1.79     | 1.08     | 0.58     | 20.3     | 0.89     | 4.18     |

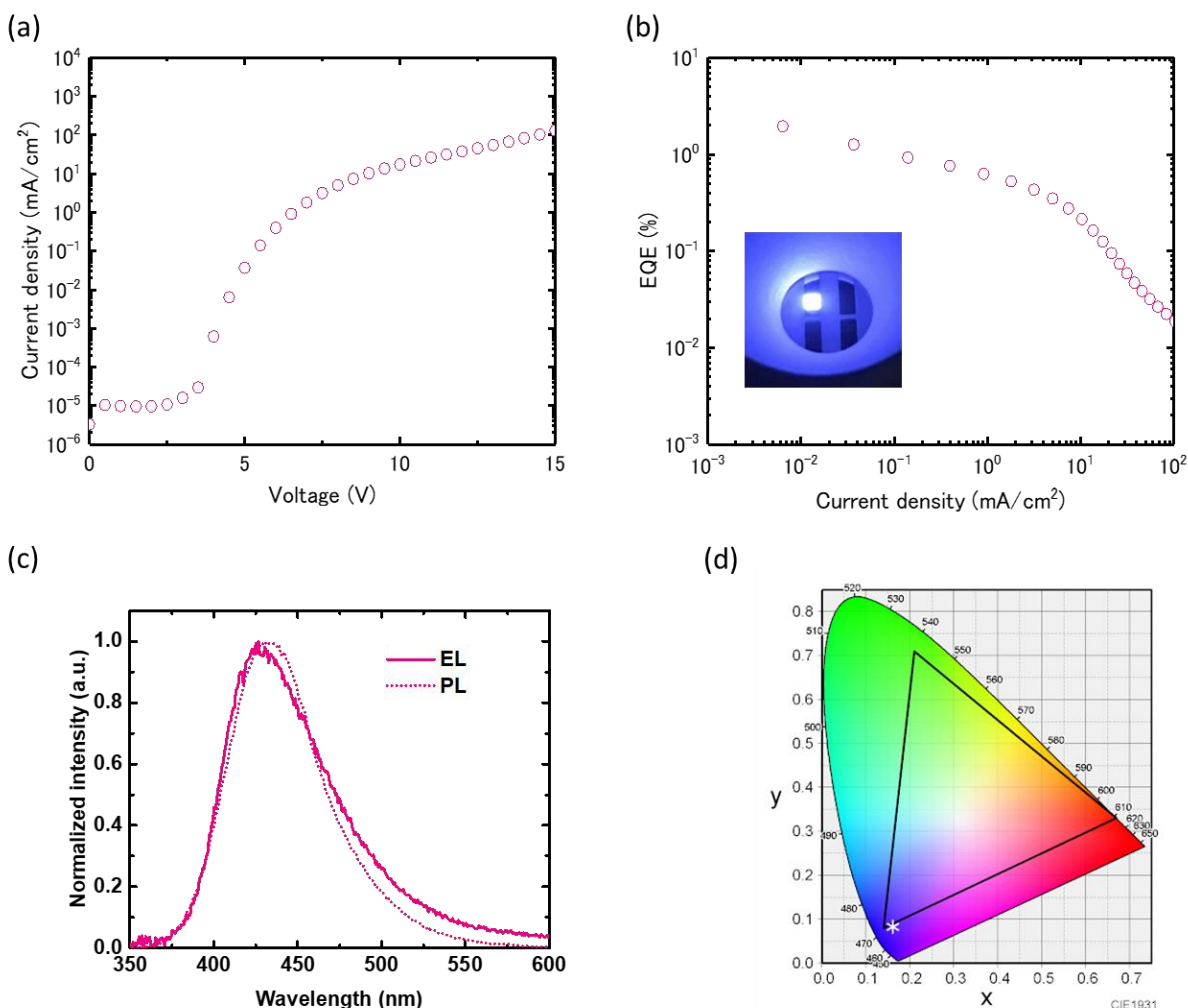

**Figure S9.** Device performance of **7**; (a) current density-voltage ( $J$ - $V$ ) plot, (b) external quantum efficiency (EQE)-luminance plot, (c) electroluminescence (EL) and PL spectra and (d) location of EL emission on the CIE coordinate system (0.161, 0.083).

## References

Hirata S, Sakai Y, Masui K, Tanaka H, Lee S-Y, Nomura H, Nakamura N, Yasumatsu M, Nakanotani H, Zhang Q, Shizu K, Miyazaki H, Adachi C. Highly efficient blue electroluminescence based on thermally activated delayed fluorescence. *Nat. Mater.* (2015) 14: 330–336.

Martin R.L. Natural transition orbitals. *J. Chem. Phys.* (2003) 118: 4775–4777.

Mulliken R S. Intensities of Electronic Transitions in Molecular Spectra I. Introduction. *J. Chem. Phys.* (1939) 7: 14–20.

Strickler S J, Berg R A. Relationship between Absorption Intensity and Fluorescence Lifetime of Molecules. *J. Chem. Phys.* (1962) 37: 814–822.
